# Supplementary material for: American Canine Hepatozoonosis Causes Multifocal Periosteal Proliferation on CT: A Case Report of 4 Dogs
Source: Frontiers journal article supplement (doi:10.3389/fvets.2022.872778), 2022-04-27
Supplement: Data_Sheet_1.pdf [file Data_Sheet_1.pdf]

**Figure S1.** Timeline of diagnostic assessments and time to intervention for four dogs with American canine hepatozoonosis.

**Dog 1**

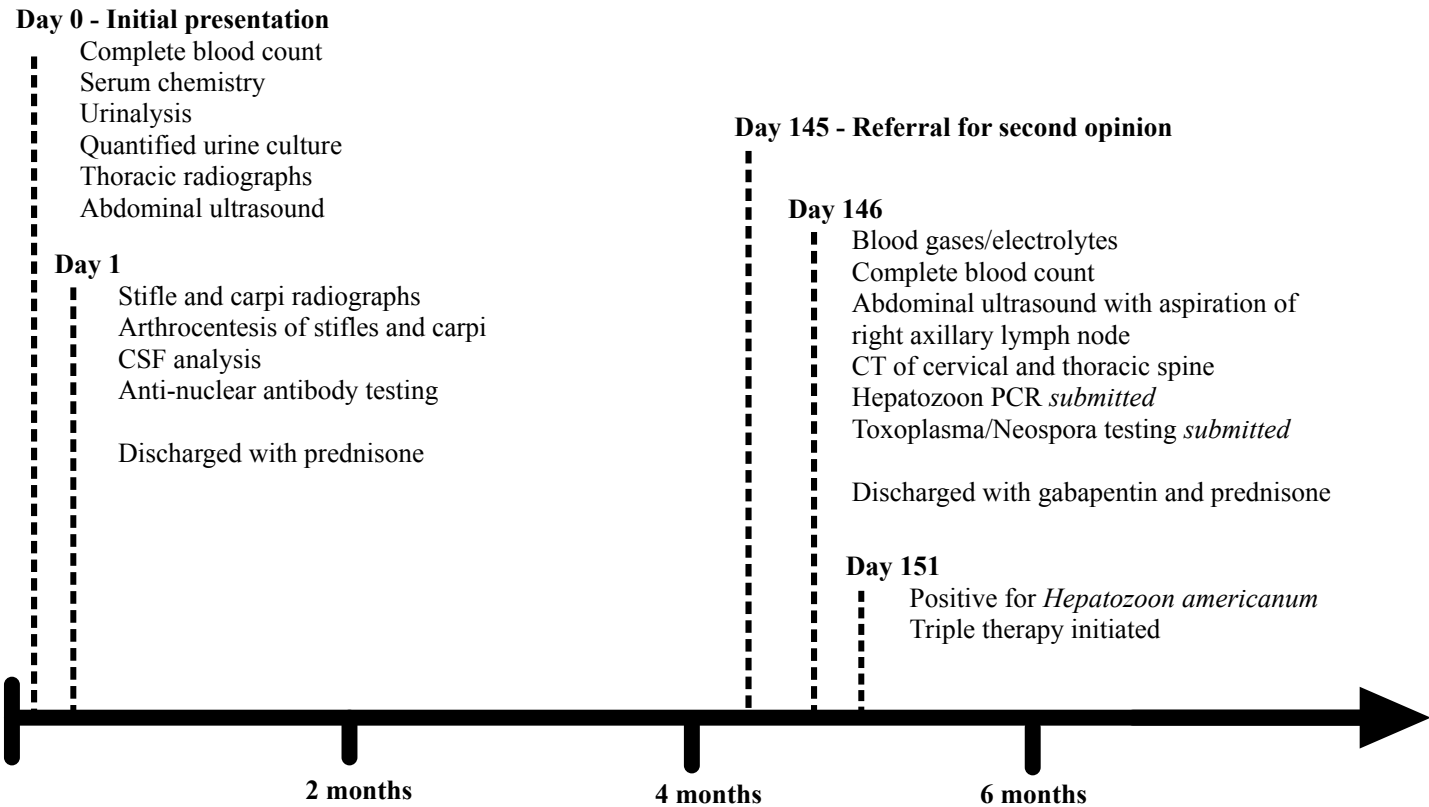

**Dog 2**

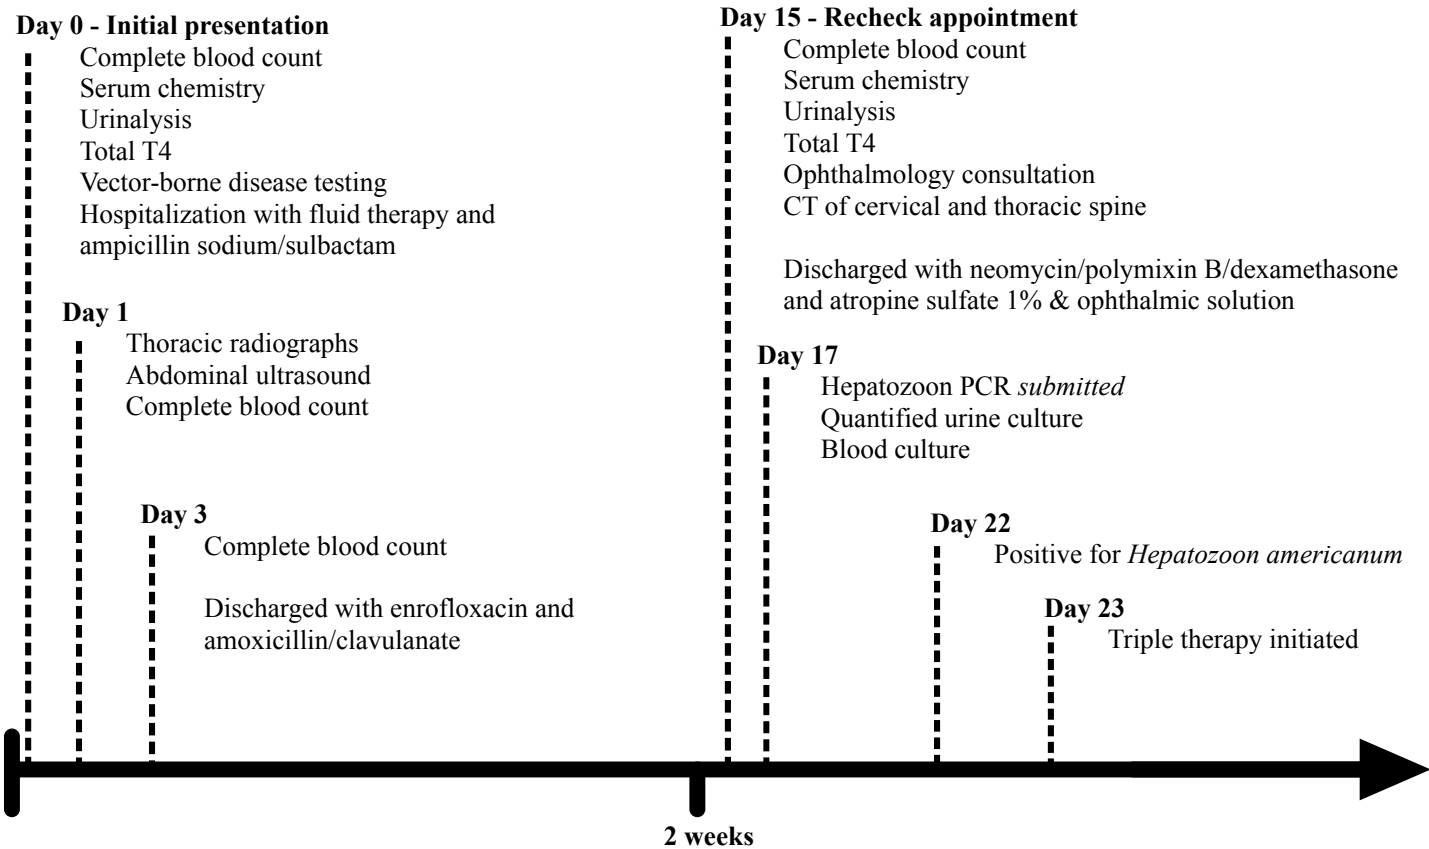

## Dog 3

### Day 0 - Initial presentation

Complete blood count  
Serum chemistry  
Urinalysis  
Abdominal ultrasound  
Thoracic radiographs  
Cervical spinal radiographs  
  
Discharged

### Day 7 - Recheck appointment

CSF analysis  
Visualization of Hepatozoon gamont  
on blood smear  
CT of head and cervical spine  
  
Discharged  
Triple therapy initiated

### Day 9 - Emergency visit

Switched to toltrazuril sulfone after  
hypersensitivity reaction to sulfa drug

1 week

## Dog 4

### Day 0 - Initial presentation

Point of care tick-borne pathogen test  
Complete blood count  
Serum chemistry  
Urinalysis  
Brucella IFA & AGID *submitted*  
Thoracic and abdominal radiographs  
Abdominal ultrasound  
Fine needle aspirate of spleen, left  
medial iliac lymph node, prostate  
CT of thoracolumbar spine  
  
Discharged on carprofen

### Day 107 - Recheck appointment

Arthrocentesis of carpi and stifles  
Serum C reactive protein testing *submitted*

### Day 108

Complete blood count  
Serum chemistry

### Day 109

Bronchoalveolar lavage with cytology,  
culture, and mycoplasma PCR *submitted*  
Abdominal ultrasound  
Pyelocentesis with cytology  
CSF analysis  
Hepatozoon PCR *submitted*

Discharged

### Day 113

Positive for *Hepatozoon americanum*

### Day 116

Triple therapy initiated

3 months

**Abbreviations:** CSF - cerebrospinal fluid, CT - computed tomography, PCR - polymerase chain reaction, IFA - immunofluorescent assay, AGID - agar gel immunodiffusion
